# Supplementary material for: Single-center retrospective study of the effectiveness and toxicity of the oral iron chelating drugs deferiprone and deferasirox
Source: PubMed Central journal article supplement (PMC6392256; doi:10.1371/journal.pone.0211942), 2019-02-27
Supplement: pone.0211942.s001.pdf [file pone.0211942.s001.pdf]

S1 Table. All patients exposed to deferiprone compared to all patients exposed to deferasirox (mean±SEM). Serum ferritin, SF; Hepatic iron concentration, HIC; baseline, BL; followu-up, FU

|                                                  |    | Deferiprone, All         | Deferasirox, All            | P value<br>deferiprone vs<br>deferasirox |
|--------------------------------------------------|----|--------------------------|-----------------------------|------------------------------------------|
| Number of intervals                              |    | 70                       | 62                          |                                          |
| Number of patients                               |    | 41                       | 56                          |                                          |
| Months exposure                                  |    | 70±2                     | 66±4                        |                                          |
| SF µg/L)                                         | BL | 3251±348                 | 2084±192                    | <b>p &lt; 0.004</b>                      |
|                                                  | FU | 3282±368<br>p < 1 vs BL  | 1645±215<br>p < 0.001 vs BL | <b>p &lt; 0.001</b>                      |
| Proportion of<br>intervals with SF<br>>2500 µg/L | BL | 45%                      | 32%                         | p < 0.2                                  |
|                                                  | FU | 48%<br>p < 1 vs BL       | 21%<br>p < 0.2 vs BL        | <b>p &lt; 0.002</b>                      |
| HIC, mg/g dry<br>weight                          | BL | 14(2)                    | 11(1)                       | p < 0.12                                 |
|                                                  | FU | 15(2)<br>p < 0.1 vs BL   | 6(1)<br>p < 0.0001 vs BL    | <b>p &lt; 0.001</b>                      |
| Proportion of<br>intervals with HIC<br>>15 mg/g  | BL | 32%                      | 27%                         | p < 0.6                                  |
|                                                  | FU | 37%<br>p < 1 vs BL       | 8%<br>p < 0.01 vs BL        | <b>p &lt; 0.001</b>                      |
| Myocardial T2*<br>(msec)                         | BL | 16(1)                    | 26(1)                       | <b>p &lt; 0.001</b>                      |
|                                                  | FU | 20(1)<br>p < 0.001 vs BL | 31(2)<br>p < 0.001 vs BL    | <b>p &lt; 0.001</b>                      |
| Proportion of<br>intervals with T2*≤10<br>msec   | BL | 25%                      | 5%                          | <b>p &lt; 0.002</b>                      |
|                                                  | FU | 12%<br>p < 0.1 vs BL     | 3%<br>p < 1 vs BL           | p < 0.1                                  |
| Proportion of<br>intervals with T2*<20<br>msec   | BL | 78%                      | 37%                         | <b>p &lt; 0.001</b>                      |
|                                                  | FU | 62%<br>p < 0.1 vs BL     | 23%<br>p < 0.2 vs BL        | <b>p &lt; 0.001</b>                      |
