# Supplementary material for: Single-center retrospective study of the effectiveness and toxicity of the oral iron chelating drugs deferiprone and deferasirox
Source: PubMed Central journal article supplement (PMC6392256; doi:10.1371/journal.pone.0211942), 2019-02-27
Supplement: pone.0211942.s002.pdf [file pone.0211942.s002.pdf]

**S2 Table.** All patients exposed to deferiprone compared to all patients exposed to deferasirox: Lab values indicating iron over-load (mean±SEM); Serum ferritin, SF; Hepatic iron concentration, HIC; (#), number of intervals; baseline, BL; follow-up, FU; significant p values, **bold**.

|                                                  |          | Deferiprone All     | Deferasirox All           |                                          |
|--------------------------------------------------|----------|---------------------|---------------------------|------------------------------------------|
| Number of intervals                              |          | 70                  | 62                        |                                          |
| Number of patients                               |          | 41                  | 56                        | p value<br>deferiprone vs<br>deferasirox |
| Months exposure                                  |          | 70±2                | 66±4                      |                                          |
| SF( µg/L)                                        | BL       | 3251±348            | 2084±192                  | <b>p &lt; 0.004</b>                      |
|                                                  | FU       | 3282±368            | 1645±215                  | <b>p &lt; 0.001</b>                      |
|                                                  | BL vs FU | p < 1 vs BL         | <b>p &lt; 0.001</b> vs BL |                                          |
| Proportion of<br>intervals with SF<br>>2500 µg/L | FU       | 45%                 | 32%                       | p < 0.2                                  |
|                                                  | BL       | 48%                 | 21%                       | <b>p &lt; 0.002</b>                      |
|                                                  | BL vs FU | p < 1 vs BL         | p < 0.2 vs BL             |                                          |
| HIC<br>mg/g dry weight                           | BL       | 14(2)               | 11(1)                     | p < 0.12                                 |
|                                                  | FU       | 15(2)               | 6(1)                      | <b>p &lt; 0.001</b>                      |
|                                                  | BL vs FU | p < 0.1             | <b>p &lt; 0.0001</b>      |                                          |
| Proportion of<br>intervals with HIC<br>>15 mg/g  | BL       | 32%                 | 27%                       | p < 0.6                                  |
|                                                  | FU       | 37%                 | 8%                        | <b>p &lt; 0.001</b>                      |
|                                                  | BL vs FU | p < 1               | <b>p &lt; 0.01</b>        |                                          |
| Myocardial T2*<br>(msec)                         | BL       | 16(1)               | 26(1)                     | <b>p &lt; 0.001</b>                      |
|                                                  | FU       | 20(1)               | 31(2)                     | <b>p &lt; 0.001</b>                      |
|                                                  | BL vs FU | <b>p &lt; 0.001</b> | <b>p &lt; 0.001</b>       |                                          |
| Proportion of<br>intervals with<br>T2*≤10 msec   | BL       | 25%                 | 5%                        | <b>p &lt; 0.002</b>                      |
|                                                  | FU       | 12%                 | 3%                        | p < 0.1                                  |
|                                                  | BL vs FU | p < 0.1             | p < 1                     |                                          |
| Proportion of<br>intervals with<br>T2*<20 msec   | BL       | 78%                 | 37%                       | <b>p &lt; 0.001</b>                      |
|                                                  | FU       | 62%                 | 23%                       | <b>p &lt; 0.001</b>                      |
|                                                  | BL vs FU | p < 0.1             | p < 0.2                   |                                          |
