# Supplementary material for: Single-center retrospective study of the effectiveness and toxicity of the oral iron chelating drugs deferiprone and deferasirox
Source: PubMed Central journal article supplement (PMC6392256; doi:10.1371/journal.pone.0211942), 2019-02-27
Supplement: pone.0211942.s003.pdf [file pone.0211942.s003.pdf]

**S3 Table. All patients exposed 30 months.** All patients exposed to deferiprone for 31.9±3.7 months compared to all patients exposed to deferasirox at 30±6 months. Lab values of iron over-load (mean±SEM(range)). Serum ferritin, SF; Hepatic iron concentration, HIC; baseline, BL; follow-up, FU; significant p values, bold; p values indicating worsening

|                                               |          | Deferiprone                 | Deferasirox                      |                                          |
|-----------------------------------------------|----------|-----------------------------|----------------------------------|------------------------------------------|
| Deferasirox dose (mg/kg/day)                  |          | –                           | 25.3±0.9(10–38)                  |                                          |
| Deferiprone dose (mg/kg/day)                  |          | 103.9±2.3(75–127)           | –                                | p value<br>deferiprone vs<br>deferasirox |
| Age at start (years)                          |          | 33.8±1.6(21.3–60.2)         | 29.6±1.3(13.4– 59)               |                                          |
| Duration of therapy (months)                  |          | 31.9±3.7                    | <i>See individual parameters</i> |                                          |
| SF( µg/L)                                     | BL       | 2665±420(135–11455)         | 2113±202(339–8117)               | <i>p</i> < 0.24                          |
|                                               | FU       | 3364 ± 504(311– 12715)      | 1600±162(159–6102)               | <b><i>p</i> &lt; 0.002</b>               |
|                                               | BL vs FU | <b><i>p</i> &lt; 0.0238</b> | <b><i>p</i> &lt; 0.037</b>       |                                          |
| Proportion of intervals with SF<br>>2500 µg/L | FU       | 37%                         | 33%                              | <i>p</i> < 0.38                          |
|                                               | BL       | 51%                         | 21%                              | <b><i>p</i> &lt; 0.0001</b>              |
|                                               | BL vs FU | <i>p</i> < 0.34             | <i>p</i> < 0.22                  |                                          |
| Months between SF                             |          | 30.6±3.7                    | 33.6±0.7                         |                                          |
| HIC mg/g dry weight                           | BL       | 10.5±1.9(0.9–43)            | 10.4±1.1(1.1–38.1)               | <i>p</i> < 0.96                          |
|                                               | FU       | 18.2±2.3(1.5–43)            | 6.3±0.9(0.9–32.8)                | <b><i>p</i> &lt; 0.0001</b>              |
|                                               | BL vs FU | <b><i>p</i> &lt; 0.0003</b> | <b><i>p</i> &lt; 0.0005</b>      |                                          |
| Proportion of intervals HIC ≤7<br>mg/g        | BL       | 56%                         | 44%                              | <i>p</i> < 0.28                          |
|                                               | FU       | 24%                         | 74%                              | <b><i>p</i> &lt; 0.0001</b>              |
|                                               | BL vs FU | <b><i>p</i> &lt; 0.0045</b> | <b><i>p</i> &lt; 0.002</b>       |                                          |
| Proportion of intervals with HIC<br>>15 mg/g  | BL       | 20.5%                       | 22%                              | <i>p</i> < 1.0                           |
|                                               | FU       | 50%                         | 9%                               | <b><i>p</i> &lt; 0.0001</b>              |
|                                               | BL vs FU | <b><i>p</i> &lt; 0.002</b>  | <i>p</i> < 0.1                   |                                          |
| Months between HIC                            |          | 29.9±3.2                    | 31.8±0.9                         |                                          |
| Myocardial T2* (msec)                         | BL       | 17.4±1.4(5.3–35.9)          | 25.9±1.4(10.9–41.9)              | <b><i>p</i> &lt; 0.0001</b>              |
|                                               | FU       | 21.5±1.7(4.6–40.0)          | 29.9±1.3(11.8–48)                | <b><i>p</i> &lt; 0.0006</b>              |
|                                               | BL vs FU | <b><i>p</i> &lt; 0.03</b>   | <b><i>p</i> &lt; 0.03</b>        |                                          |
| Proportion of intervals with<br>T2*≤10 msec   | BL       | 17.60%                      | No patients                      | N/A                                      |
|                                               | FU       | 6%                          | No patients                      | N/A                                      |
|                                               | BL vs FU | <i>p</i> < 0.26             |                                  |                                          |
| Proportion of intervals with<br>T2*<20 msec   | BL       | 73%                         | 37%                              | <b><i>p</i> &lt; 0.002</b>               |
|                                               | FU       | 50%                         | 23%                              | <b><i>p</i> &lt; 0.012</b>               |
|                                               | BL vs FU | <i>p</i> < 0.08             | <i>p</i> < 0.16                  |                                          |
| Months between myocardial T2*s                |          | 28.5±3.7                    | 32.6±1.4                         |                                          |
